# Supplementary material
Source: Springer Nature journal article supplement (https://www.springermedizin.de/resource/supplementary/12889_2011_4397_MOESM1_ESM.pdf/9492428)

Telephone interviews

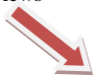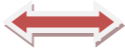

Case studies

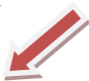

Analysis

Supplement: MOESM1 [file 9492428]
